# Supplementary material for: Human GBP1 is a microbe‐specific gatekeeper of macrophage apoptosis and pyroptosis
Source: PubMed Central journal article supplement (PMC6600649; doi:10.15252/embj.2018100926), 2019-06-03
Supplement: EMBJ-38-e100926-s004.pdf [file EMBJ-38-e100926-s004.pdf]

# Immunoblots from Figure 3D

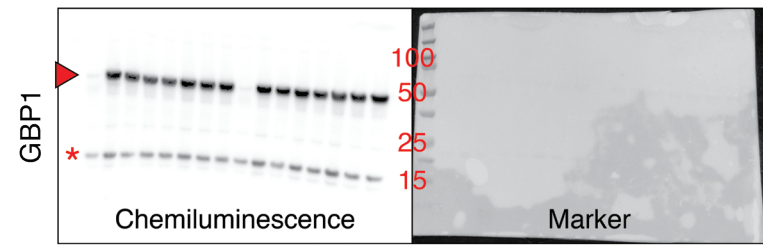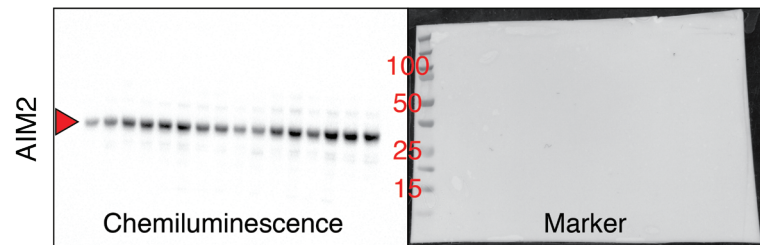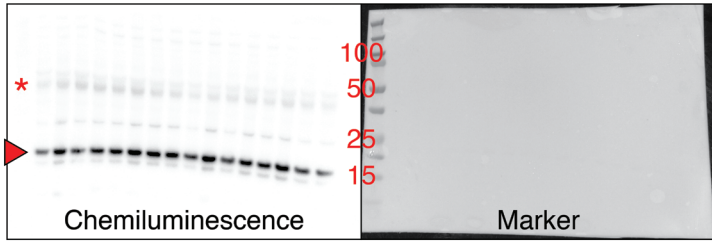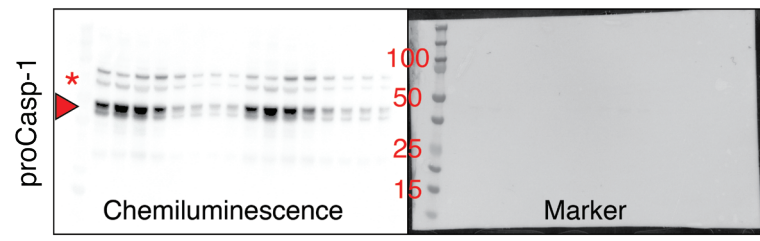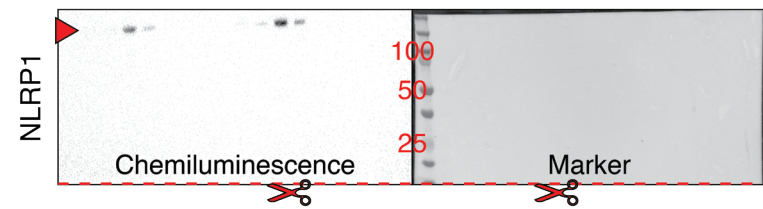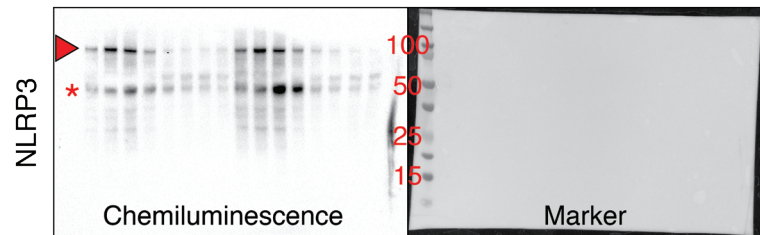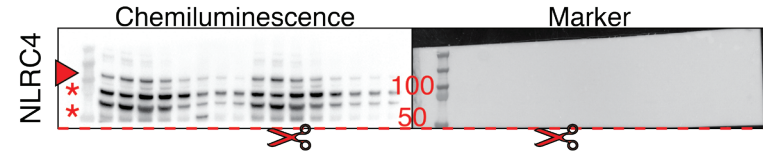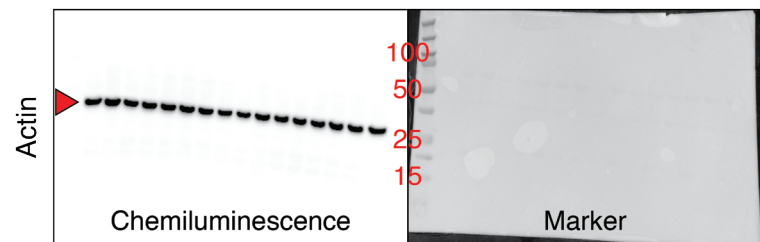

100 Size marker in kDa  
(Biorad, Precision Plus Dual color)

\* Unspecific bands or  
bands from previous antibody

▶ Protein band of interest

- ✂ - Indicates if membrane was cut  
prior to developing the immunoblot
